# Supplementary material for: Ontogenetic braincase development in Psittacosaurus lujiatunensis (Dinosauria: Ceratopsia) using micro-computed tomography
Source: PeerJ. 2019 Aug 14;7:e7217. doi: 10.7717/peerj.7217 (PMC6698140; doi:10.7717/peerj.7217)
Supplement: Supplemental Information 1 — bo, basioccipital; bsp, basisphenoid; bt, basal tubera; cp, cultriform process; fr, frontal; lsp, laterosphenoid; OC, occipital condyle; par, parietal; pop, paroccipital process; pr, prootic; soc, supraoccipital. W, width; l, length; h, height. [file peerj-07-7217-s001.xlsx]

## Sheet: Sheet1
	Hatchling			Juvenile			Adult
	Element (mm)	Skull (mm)	%	Element (mm)	Skull (mm)	%	Element (mm)	Skull (mm)	%
BO w	5.8	23.6	0.245763	16.6	86.5	0.191908	32	143.7	0.222686
BO l	5.4	23.6	0.228814	14	86.5	0.16185	26.4	143.7	0.183716
bt h	1.2	23.6	0.0508475	4.4	86.5	0.0508671	16.4	143.7	0.114127
bt w	2.9	23.6	0.122881	8.8	86.5	0.101734	16	143.7	0.111343
OC w	3	23.6	0.127119	6.8	86.5	0.0786127	14.3	143.7	0.0995129
OC h	2	23.6	0.0847458	5	86.5	0.0578035	11.9	143.7	0.0828114
BSp w	7.3	23.6	0.309322	20	86.5	0.231214	35.9	143.7	0.249826
BSp l	5.9	23.6	0.25	15.9	86.5	0.183815	27.8	143.7	0.193459
cp l	6.9	23.6	0.292373	23.5	86.5	0.271676	11.1	143.7	0.0772443
POP l	6.2	23.6	0.262712	0	86.5	0	59.3	143.7	0.412665
POP h	2.8	23.6	0.118644	0	86.5	0	19.6	143.7	0.136395
SOC h	3.6	23.6	0.152542	0	86.5	0	12.3	143.7	0.085595
SOC w	8.7	23.6	0.368644	9.8	86.5	0.113295	6.8	143.7	0.0473208
Lsp w	4.2	23.6	0.177966	6.8	86.5	0.0786127	14.5	143.7	0.100905
Lsp l	5.2	23.6	0.220339	15.4	86.5	0.178035	25.9	143.7	0.180237
Pr l	7.1	23.6	0.300847	12.8	86.5	0.147977	29.2	143.7	0.203201
Pr w	3.9	23.6	0.165254	0	86.5	0	13.5	143.7	0.0939457
Par l	7.4	23.6	0.313559	16.3	86.5	0.188439	39.8	143.7	0.276966
Fr l	11.2	23.6	0.474576	30.6	86.5	0.353757	54	143.7	0.375783
Fr w	15.8	23.6	0.669492	36.5	86.5	0.421965	51.5	143.7	0.358386
